# Supplementary material for: Self-regenerative noble metal catalysts supported on high-entropy oxides
Source: Royal Society of Chemistry journal article supplement (doi:10.1039/d0cc05860b), 2020-01-01
Supplement: d0cc05860b1.pdf [file d0cc05860b1.pdf]

Supporting Information

**Self-Regenerative Noble Metal Catalysts Supported on High-Entropy Oxides**

Hao Chen,<sup>a</sup> Yifan Sun,<sup>\*b</sup> Shize Yang,<sup>†c</sup> Hui Wang,<sup>d</sup> Wojciech Dmowski,<sup>d</sup> Takeshi Egami,<sup>def</sup> Sheng Dai<sup>\*ab</sup>

<sup>a</sup> Department of Chemistry, The University of Tennessee, Knoxville, Tennessee 37996, USA. E-mail: dais@ornl.gov.

<sup>b</sup> Chemical Sciences Division, Oak Ridge National Laboratory, Oak Ridge, Tennessee 37831, USA. E-mail: suny@ornl.gov.

<sup>c</sup> Center for Functional Nanomaterials, Brookhaven National Laboratory, Upton, New York 11973, USA

<sup>d</sup> Department of Materials Science and Engineering, The University of Tennessee, Knoxville, Tennessee 37996, USA

<sup>e</sup> Department of Physics and Astronomy, The University of Tennessee, Knoxville, Tennessee 37996, USA

<sup>f</sup> Materials Science and Technology Division, Oak Ridge National Laboratory, Oak Ridge, Tennessee 37831, USA

<sup>†</sup> Current Address: Eyring Materials Center, Arizona State University, Tempe, Arizona 85287, USA

## **Experimental Details**

**Materials.** Magnesium oxide (MgO, 98%, -100 mesh), copper (II) oxide (CuO,  $\geq 99\%$ ) and zinc oxide (ZnO, 98%) were purchased from ACROS Organics. Cobalt (II) oxide (CoO, 95%) and nickel (II) oxide (NiO, 99.0%) were purchased from Alfa Aesar. Gold (III) oxide hydrate ( $\text{Au}_2\text{O}_3 \cdot x\text{H}_2\text{O}$ ), palladium (II) oxide (PdO, 99.97% trace metals basis) and ruthenium (IV) oxide ( $\text{RuO}_2$ , 99.9% trace metals basis) were purchased from Sigma Aldrich. All chemicals were used as received without further purification.

**Synthesis of Au-HEOs.** Solid-state synthesis of HEOs and Au-HEOs are modified based on the previous report.<sup>1</sup> 5 mmol of NiO (374 mg), MgO (202 mg), CuO (398 mg), ZnO (407 mg) and CoO (375 mg), together with 22 mg  $\text{Au}_2\text{O}_3$  corresponding to 1 wt% Au loading, were thoroughly grinded. Au-HEO-900 was prepared by calcinating the mixed powders to 900 °C in air for 4 h, and naturally cooling down to room temperature. Similar synthetic protocols were adopted for other 1 wt% HEO-supported noble metal samples. Au-HEO-700 was obtained by calcinating the Au-HEO-900 sample at 700 °C in air for 4 h, and naturally cooling down to room temperature.

**Characterization.** Powder X-ray diffraction (XRD) patterns were collected using a PANalytical Empyrean X-ray diffractometer equipped with Cu K $\alpha$  radiation, with the operating voltage of 45 kV and current of 40 mA. Simulated XRD patterns were generated using the CrystalMaker/CrystalDiffract software package. High-angle annular dark-field scanning transmission electron microscopy (HAAD-STEM) images and energy dispersive X-ray spectroscopy (EDS) data with element maps were collected on a FEI Talos 200F microscope at 200 kV. Inductively coupled plasma-atomic emission spectroscopy (ICP-AES) was performed using an Optima 2100 DV spectrometer (PerkinElmer Corporation). X-ray photoelectron spectroscopy (XPS) measurements were performed with a PHI 3056 spectrometer equipped with an Al anode source operated at 15 kV with an applied power of 350 W and a pass energy of 93.5 eV. Samples were mounted on foil, and peaks were charge referenced to the  $\text{CH}_x$  peak in the carbon 1s spectra at 284.8 eV. The high-energy x-rays (100 keV,  $\lambda = 0.1235 \text{ \AA}$ ) diffraction experiments on the powder samples were performed at the 6-ID beamlines of the Advanced Photon Source (APS) at Argonne National Laboratory. Two-dimensional (2D) detectors, placed  $\sim 40$  cm behind the sample, with  $2048 \times 2048$  pixels and  $200\mu\text{m} \times 200\mu\text{m}$  pixel size were used to collect data. Calibration was performed using the  $\text{CeO}_2$  standard samples from National Institute of Standards and Technology (NIST). 2D diffraction data were processed by FIT2D.<sup>2</sup> GSAS-II was used to obtain the structure information.<sup>3</sup>

**Catalytic measurements.** CO oxidation was performed using the Altamira Instruments system with the catalysts loaded in a fixed-bed reactor (U-type quartz tube) with inner diameter of 4 mm at atmospheric pressure. 40 mg of the Au-HEO catalyst was loaded in the reactor with quartz wool as support. The feed gas of 1% CO balanced with dry air passed through the catalyst bed at a flow rate of  $12 \text{ mL min}^{-1}$ , corresponding to a gas hourly space velocity of  $18000 \text{ mL (h g)}^{-1}$ . The reactants and products were analyzed using a Buck MG#5 gas chromatograph (GC) equipped with a thermal conductivity detector and a ShinCarbon ST column.

## Supplementary Tables

**Table S1** Noble metal percentages supported on HEOs quantified by ICP-AES.

| Sample     | Noble Metal Element | Percentage / wt% |
|------------|---------------------|------------------|
| Au-HEO-900 | Au                  | 1.1              |
| Au-HEO-700 | Au                  | 0.9              |
| Pd-HEO-900 | Pd                  | 1.8              |
| Ru-HEO-900 | Ru                  | 1.3              |

**Table S2** GSAS-II Rietveld refinement results.

| Sample     | Lattice Parameter of FCC Structure / Å | FCC Phase Percentage / % | R <sub>wp</sub> / % |
|------------|----------------------------------------|--------------------------|---------------------|
| MgO        | 4.214                                  | 100                      | 6.7                 |
| HEO        | 4.208                                  | 84.7                     | 9.7                 |
| Au-HEO-900 | 4.219                                  | 100                      | 10.6                |

## Supplementary Figures

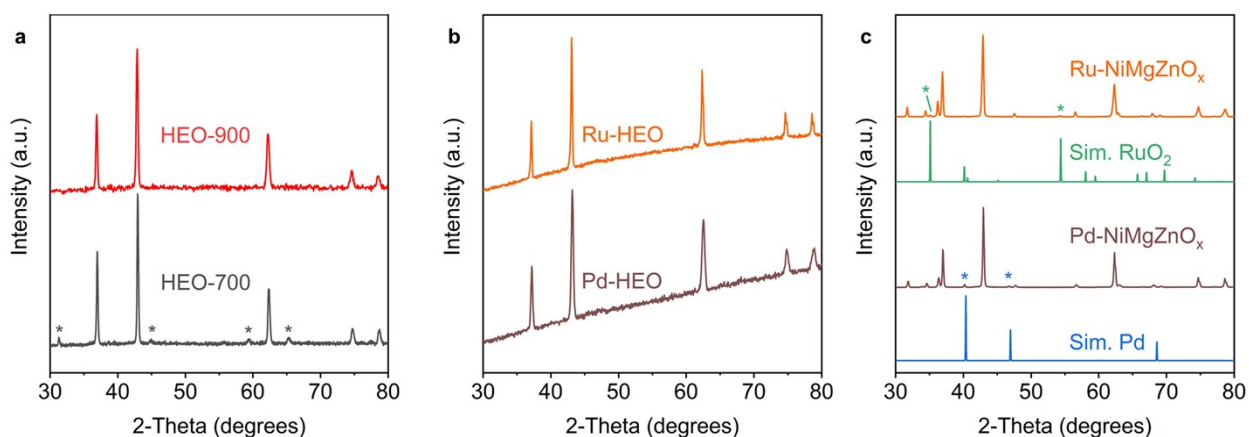

**Fig. S1** Powder XRD patterns of (a) HEO prepared at 900 °C (HEO-900) and annealed at 700 °C (HEO-700), (b) 1 wt% Pd and Ru supported on HEOs calcinated at 900 °C, and (c) 1 wt% Pd and Ru supported on ternary oxides (NiMgZnO<sub>x</sub>) calcinated at 900 °C, with emerging impurity peaks highlighted with asterisk symbols. Simulated XRD patterns for RuO<sub>2</sub> and Pd are listed for comparison.<sup>4,5</sup>

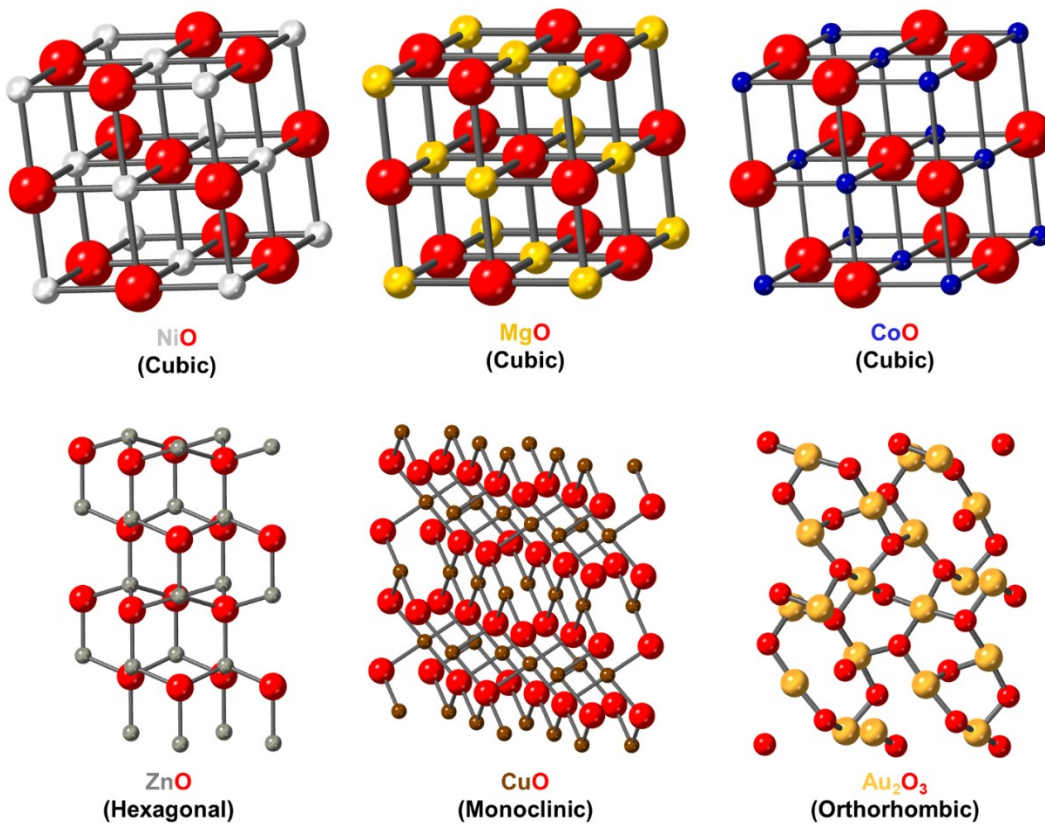

**Fig. S2** Crystal structures of NiO, MgO, CoO, ZnO, CuO and Au<sub>2</sub>O<sub>3</sub>.<sup>6-9</sup> One unit cell is exhibited for NiO, MgO, CoO, and Au<sub>2</sub>O<sub>3</sub>, while eight are included for ZnO and CuO for a better illustration.

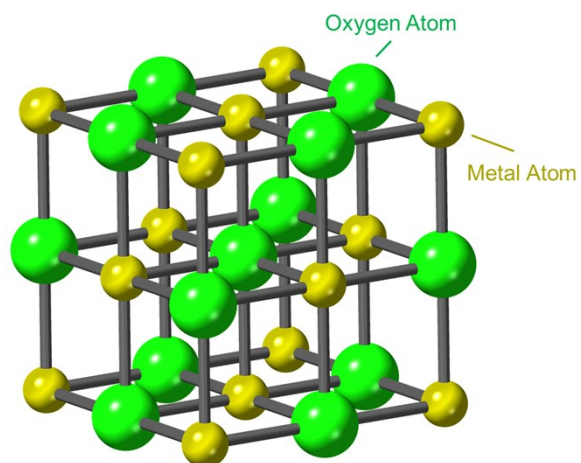

**Fig. S3** Schematic showing the positions of metal (dark yellow) and oxygen (green) atoms in the cubic lattice of Au-HEO-900 for GSAS-II refinement.

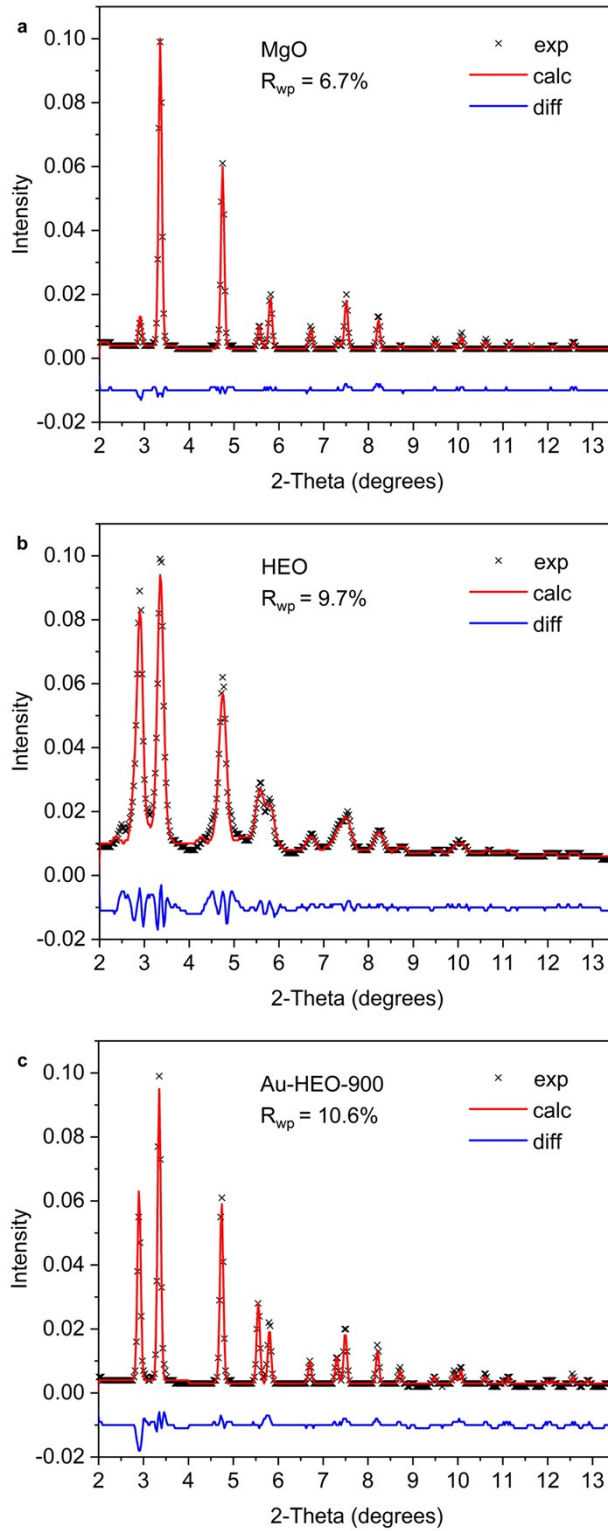

**Fig. S4** Rietveld refinements for (a) MgO, (b) HEO, and (c) Au-HEO-900 by GSAS-II.

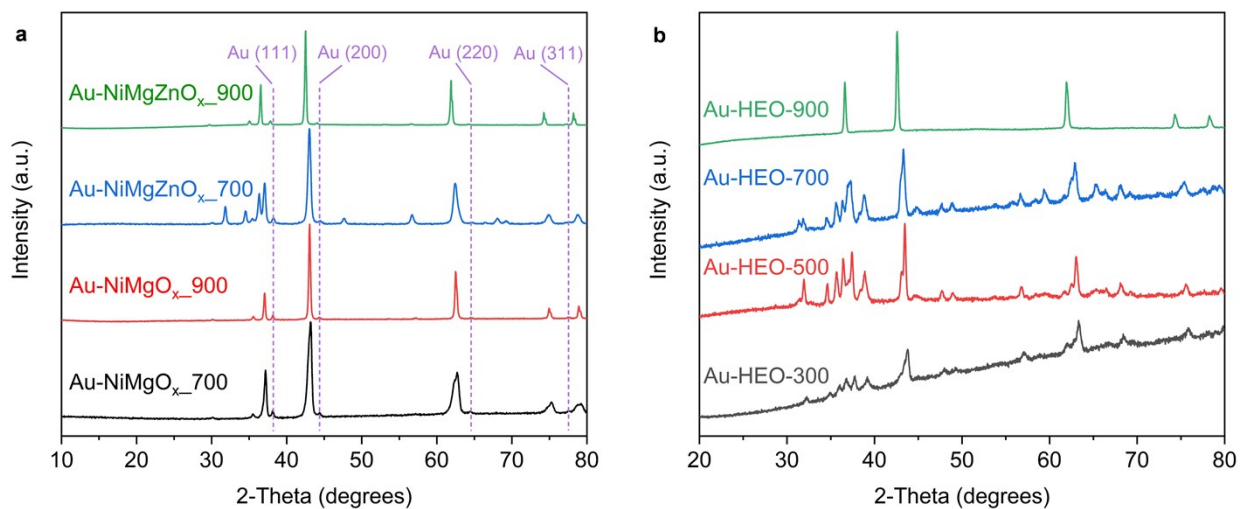

**Fig. S5** (a) Powder XRD patterns of Au supported on binary (NiMgO<sub>x</sub>) and ternary (NiMgZnO<sub>x</sub>) oxides at 700 and 900 °C, respectively, where multiple impurity phases appear. Diffraction peaks corresponding to Au are highlighted by the purple dotted lines. (b) Powder XRD patterns of Au-HEO synthesized via annealing at different temperatures in air.

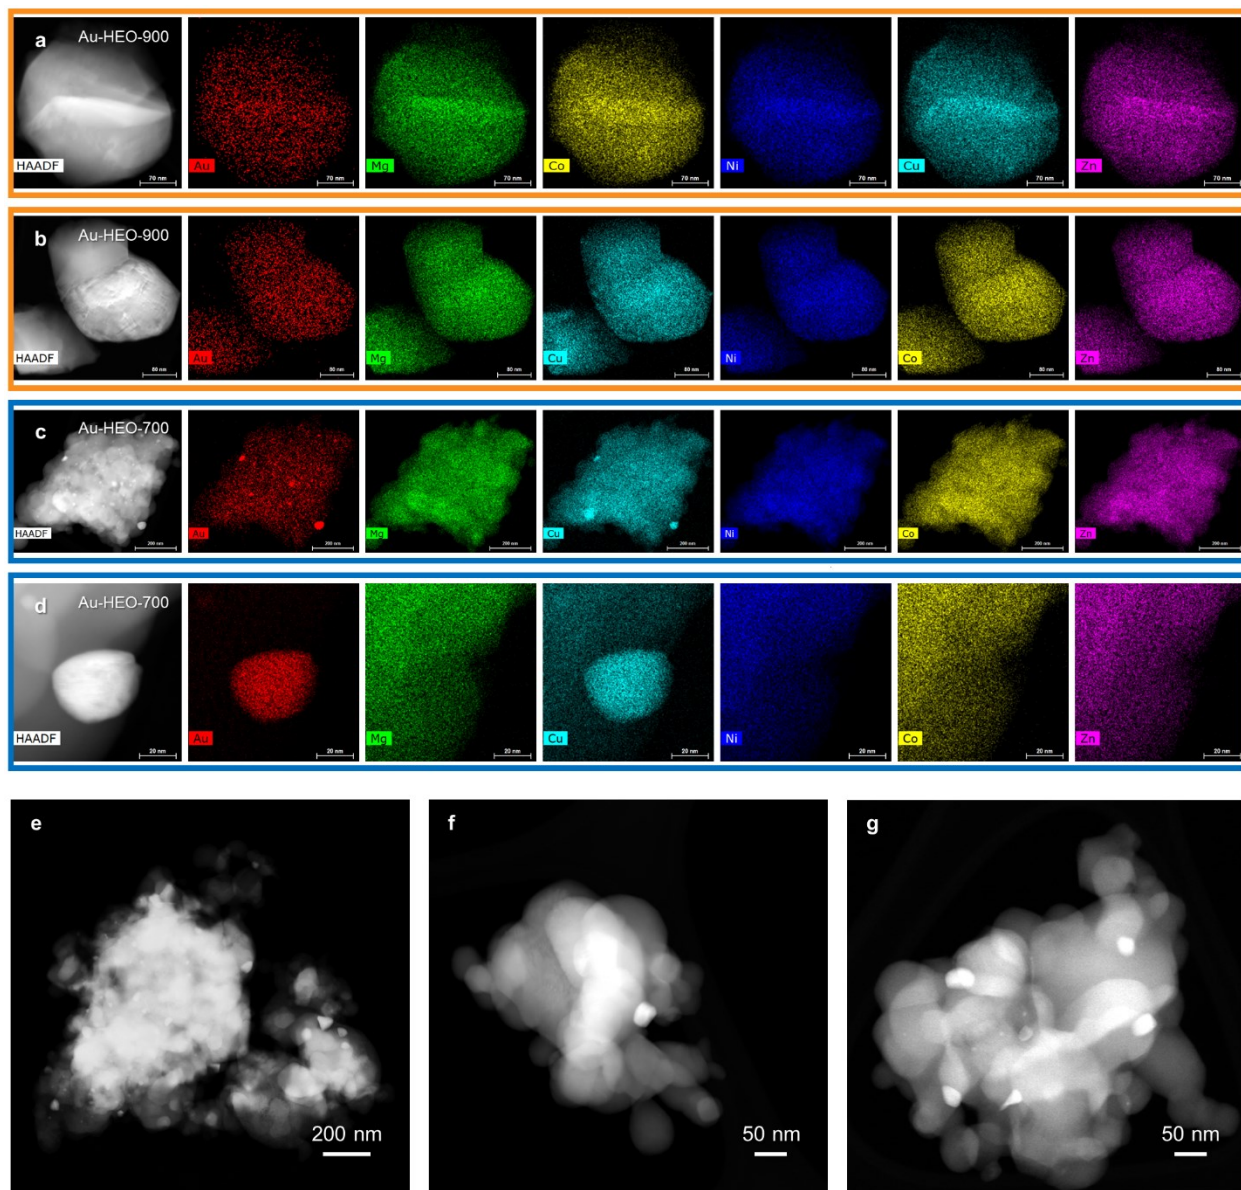

**Fig. S6** HAADF-STEM images with EDS elemental maps of (a,b) Au-HEO-900 and (c,d) Au-HEO-700. (e-f) Additional HAADF-STEM images showing the formation of the exsolved Au nanoparticles that exhibit higher contrast in Au-HEO-700.

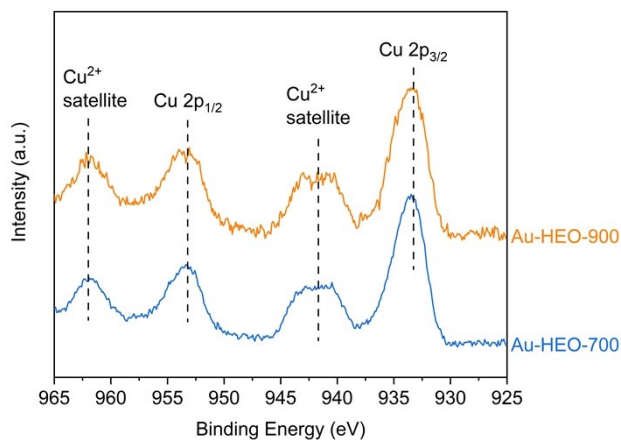

**Fig. S7** XPS spectra for Au-HEO-700 and Au-HEO-900 of the Cu 2p region, showing the existence of  $\text{Cu}^{2+}$  in both cases.

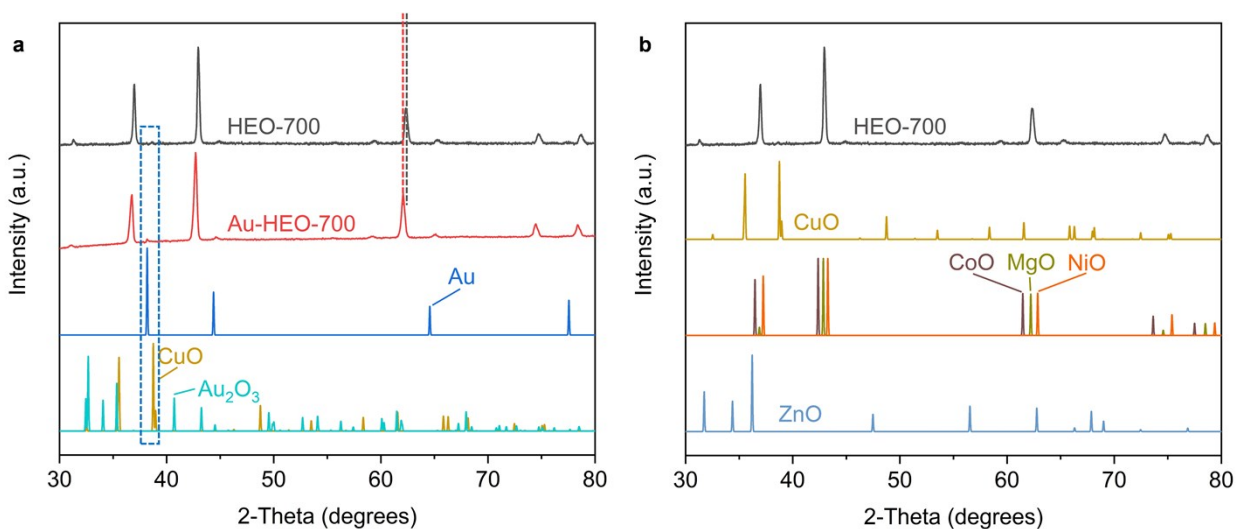

**Fig. S8** (a) Powder XRD patterns of HEO-700 and Au-HEO-700 with simulated reference patterns of Au, CuO and  $\text{Au}_2\text{O}_3$ , where the impurity peak of Au-HEO-700 around  $38^\circ$  is attributed to Au, rather than CuO or  $\text{Au}_2\text{O}_3$ , based on the comparison highlighted by the dotted blue lines.<sup>5</sup> The diffraction peaks of Au-HEO-700 are shifted towards the lower angles compared with the ones from HEO-700, indicating lattice expansion caused by residual Au cations in the HEO lattice. (b) Powder XRD pattern of HEO-700 with simulated ones of CuO, CoO, MgO, NiO and ZnO.<sup>6-9</sup>



## References

- [1] Rost, C. M.; Sachet, E.; Borman, T.; Moballegh, A.; Dickey, E. C.; Hou, D.; Jones, L. J.; Curtarolo, S.; Maria, J.-P. Entropy-Stabilized Oxides. *Nat. Commun.* **2015**, *6*, 8485.
- [2] Hammersley, A. P.; Svensson, S. O.; Thompson, A.; Graafsma, H.; Kvick, A.; Moy, J. P. Calibration and Correction of Spatial Distortions in 2D Detector Systems. *Rev. Sci. Instr., (SRI-94)*, **1995**, *66*, 2729–2733.
- [3] Toby, B. H.; Von Dreele, R. B. GSAS-II: The Genesis of a Modern Open-Source All Purpose Crystallography Software Package. *J. Appl. Crystallogr.* **2013**, *46*, 544–549.
- [4] Takeda, T.; Nagata, M.; Kobayashi, H.; Kanno, R.; Kawamoto, Y.; Takano, M.; Kamiyama, T.; Izumi, F.; Sleight, A. W. High-Pressure Synthesis, Crystal Structure, and Metal–Semiconductor Transitions in the  $Tl_2Ru_2O_{7-\delta}$  Pyrochlore. *J. Solid State Chem.* **1998**, *140*, 182–193.
- [5] Davey, W. P. Precision Measurements of the Lattice Constants of Twelve Common Metals. *Phys. Rev. B.* **1925**, *25*, 753–761.
- [6] Sasaki, S.; Fujino, K.; Takéuchi, Y. X-Ray Determination of Electron-Density Distributions in Oxides, MgO, MnO, CoO, and NiO, and Atomic Scattering Factors of their Constituent Atoms. *Proc. Japan Acad. Ser. B* **1979**, *55*, 43–48.
- [7] Schulz, H.; Thiemann, K. H. Structure Parameters and Polarity of the Wurtzite Type Compounds  $Sic-2H$  and ZnO. *Solid State Commun.* **1979**, *32*, 783–785.
- [8] Åsbrink, S.; Norrby, L.-J. A Refinement of the Crystal Structure of Copper(II) Oxide with a Discussion of Some Exceptional e.s.d.'s. *Acta Cryst. B* **1970**, *26*, 8–15.
- [9] Jones, P. G.; Rumpel, H.; Schwarzmann, E.; Sheldrick, G. M.; Paulus, H. Gold(III) oxide. *Acta Cryst. B* **1979**, *35*, 1435–1437.
